# Supplementary material for: Measuring Cation Dependent DNA Polymerase Fidelity Landscapes by Deep Sequencing
Source: PLoS One. 2012 Aug 22;7(8):e43876. doi: 10.1371/journal.pone.0043876 (PMC3425509; doi:10.1371/journal.pone.0043876)
Supplement: Table S3 — Primer Extension Assay Buffers. Buffers used for annealing and extension for each of the DNAPs studied. (XLS) [file pone.0043876.s007.xls]

## Sheet: Sheet1
Polymerase	Dpo4	Klenow exo-	Phusion HF
Annealing Buffer	10 mM HEPES-NaOH (pH 7.4), 1 mM DTT, 50 mM NaCl, 100 μg/ml BSA, 0.1% Triton X-100	10 mM Tris-Cl pH 7.9, 50 mM NaCl, 1 mM dithiothreitol	10 mM Tris-Cl pH 8.5
Extension Buffer	Annealing Buffer	Annealing Buffer	1× HF Buffer
